# Supplementary material
Source: Royal Society of Chemistry journal article supplement (doi:10.1039/d6ta01092j)
Supplement: d6ta01092j1.xlsx [file d6ta01092j1.xlsx]

## Sheet: Sheet
idx	Formula	Phase	Ehull (meV/atom)	ΔE (meV/atom)	SevenNet-0			DFT
					σ1000K (mS/cm)	Ea (eV)	σ300K (mS/cm)	Ea (eV)	σ300K (mS/cm)	Error bound [σmin, σmax] (mS/cm)
1	LiTa1Si2O7	V	27.88	11.87	212.7	0.263 ± 0.118	2.865	-	-	-
2	Li1Ta1Si2O7	IX	33.18	17.17	956.2	0.316 ± 0.049	0.53	-	-	-
3	Li1Ta1Si2O7	X	35.79	19.78	366.4	0.2 ± 0.062	11.215	0.228 ± 0.015	4.141	[2.346, 7.311]
4	Li1Ta1Si2O7	XIV	39.71	23.7	278.3	0.263 ± 0.045	1.377	-	-	-
5	Li1Ta1Si2O7	XVI	39.97	23.96	325.7	0.31 ± 0.032	0.145	-	-	-
6	Li1Ta1Si2O7	XVIII	41.42	25.41	286.7	0.218 ± 0.052	3.882	-	-	-
7	Li1Ta1Si2O7	XXI	42.23	26.22	297.4	0.255 ± 0.024	1.342	-	-	-
8	Li1Ta1Si2O7	XXV	44.02	28.01	863.9	0.162 ± 0.023	39.635	-	-	-
9	Li1Ta1Si2O7	XXVI	44.04	28.03	617.3	0.185 ± 0.084	12.565	-	-	-
10	Li1Ta1Si2O7	XXVII	44.43	28.42	220.1	0.303 ± 0.024	0.153	-	-	-
11	Li1Ta1Si2O7	XXVIII	44.44	28.43	1412.9	0.137 ± 0.109	33.47	-	-	-
12	Li1Ta1Si2O7	XXIX	44.59	28.58	1325.2	0.23 ± 0.277	0.963	-	-	-
13	Li1Ta1Si2O7	XXXVI	46.59	30.58	372.5	0.319 ± 0.013	0.166	-	-	-
14	Li1Ta1Si2O7	XLIII	48.15	32.14	228.7	0.153 ± 0.051	13.183	-	-	-
15	Li1Ta1Si2O7	L	49.37	33.36	528.4	0.278 ± 0.022	1.481	-	-	-
16	Li1Ta1Si2O7	LI	49.47	33.46	172.9	0.256 ± 0.023	0.884	-	-	-
17	Li1Ta1Si2O7	LII	49.48	33.47	194.8	0.35 ± 0.027	0.121	-	-	-
18	Li1Ta1Si2O7	LV	49.94	33.93	2380.4	0.18 ± 0.025	18.554	-	-	-
19	Li2Hf1Si1O5	I	18.6	0	1683.4	0.244 ± 0.009	5.408	0.299 ± 0.02	1.127	[0.516, 2.463]
20	Li2Hf1Si1O5	II	18.76	0.16	1233	0.29 ± 0.007	1.347	0.375 ± 0.063	0.113	[0.01, 1.276]
21	Li2Hf1Si1O5	V	47.68	29.08	609.7	0.331 ± 0.017	0.253	-	-	-
22	Li2Hf1Si2O7	I	12.05	0	987.2	0.23 ± 0.073	5.475	0.319 ± 0.07	0.392	[0.026, 5.879]
23	Li2Hf1Si2O7	III	18.27	6.22	494.6	0.243 ± 0.043	2.056	0.234 ± 0.082	2.388	[0.1, 56.801]
24	Li2Hf1Si2O7	XXV	33.88	21.83	401.8	0.173 ± 0.021	9.811	0.197 ± 0.037	6.027	[1.437, 25.277]
25	Li1Nb1Si1O5	VII	36.94	31.71	596.3	0.296 ± 0.009	0.445	0.371 ± 0.069	0.046	[0.003, 0.654]
26	Li1Nb1Si1O5	XV	45.7	40.47	371.5	0.293 ± 0.025	0.884	0.214 ± 0.033	7.189	[1.991, 25.955]
27	Li2Nb2Si3O12	I	30.9	0	421.3	0.291 ± 0.026	0.339	0.301 ± 0.085	0.232	[0.009, 6.211]
28	Li2Nb2Si3O12	II	31.54	0.64	509	0.322 ± 0.043	0.595	0.267 ± 0.023	3.006	[1.245, 7.256]
29	Li2Nb2Si3O12	XVII	49.68	18.78	420.7	0.13 ± 0.031	24.368	-	-	-
30	Li2Nb2Si1O8	II	26.92	11.15	734.2	0.267 ± 0.039	1.81	-	-	-
31	Li2Nb2Si1O8	VII	36.22	20.45	1016.6	0.203 ± 0.026	14.378	-	-	-
32	Li2Nb2Si1O8	IX	37.25	21.48	1199.9	0.285 ± 0.037	1.295	-	-	-
33	Li2Nb2Si1O8	XI	42.76	26.99	206.8	0.293 ± 0.026	0.447	-	-	-
34	Li1Nb2P1O8	II	25.34	9.25	1252.2	0.224 ± 0.047	4.683	0.353 ± 0.08	0.092	[0.004, 1.99]
35	Li1Nb2P1O8	III	26.08	9.99	777.5	0.198 ± 0.009	10.935	0.201 ± 0.034	7.82	[2.079, 29.416]
36	Li1Nb2P1O8	V	31.1	15.01	886.3	0.294 ± 0.01	0.553	-	-	-
37	Li1Nb2P1O8	XV	49.65	33.56	134.5	0.221 ± 0.029	4.246	-	-	-
38	Li3Nb3Si2O13	IX	44.05	9.6	273.2	0.226 ± 0.01	1.923	0.465 ± 0.026	0.002	[0.001, 0.007]
39	Li3Nb3Si2O13	X	44.12	9.67	1397.5	0.254 ± 0.026	3.395	0.274 ± 0.021	2.182	[0.959, 4.961]
40	Li3Nb3Si2O13	XIV	46.92	12.47	158.9	0.175 ± 0.113	9.526	-	-	-
41	Li2Zr1Si2O7	VI	27.93	2.08	667.3	0.331 ± 0.031	0.335	0.277 ± 0.017	1.245	[0.657, 2.356]
42	Li2Zr1Si2O7	VII	28.2	2.35	443.7	0.279 ± 0.028	0.763	0.288 ± 0.067	0.553	[0.042, 7.335]
43	Li2Ta2Si1O8	I	17.92	0	291	0.367 ± 0.068	0.1	0.562 ± 0.139	0	[0.0, 0.083]
44	Li2Ta2Si1O8	IV	41.62	23.7	909.1	0.358 ± 0.053	0.211	-	-	-
45	Li2Ta2Si1O8	V	42.88	24.96	604.5	0.18 ± 0.017	19.915	-	-	-
46	Li2Ta2Si1O8	VII	46.46	28.54	467.2	0.159 ± 0.018	18.405	-	-	-
47	Li2Ta2Si1O8	VIII	46.82	28.9	1828.9	0.128 ± 0.029	171.701	0.323 ± 0.018	0.524	[0.264, 1.043]
48	Li2Ta2Si1O8	IX	47.87	29.95	272.6	0.184 ± 0.047	4.938	-	-	-
49	Li2Ta2Si1O8	XII	49.4	31.48	2289	0.21 ± 0.024	20.467	-	-	-
50	Li2Ta2Si3O12	V	28.07	17.14	1372.1	0.288 ± 0.053	1.235	0.306 ± 0.025	0.896	[0.336, 2.387]
51	Li2Ta2Si3O12	IX	40.04	29.11	526.1	0.307 ± 0.061	0.468	-	-	-
52	Li2Ta2Si3O12	XI	42.54	31.61	546.5	0.296 ± 0.054	0.52	-	-	-
53	Li2Ta2Si3O12	XVII	47.34	36.41	182.7	0.275 ± 0.029	0.437	-	-	-
54	Li2Ta2Si3O12	XXI	49.42	38.49	3490.3	0.178 ± 0.064	39.12	-	-	-
55	Li1Nb3P2O13	III	38.11	19.99	444.3	0.245 ± 0.01	1.788	0.277 ± 0.175	0.543	[0.001, 476.896]
56	Li1Nb3P2O13	IV	43.62	25.5	599	0.3 ± 0.028	0.259	0.241 ± 0.064	0.844	[0.071, 10.091]
57	Li2Mg1P2O7	II	13.73	10.07	717.4	0.118 ± 0.135	109.943	-	-	-
58	Li2Mg1P2O7	IV	25.47	21.81	234.9	0.314 ± 0.028	0.218	0.279 ± 0.029	0.651	[0.212, 1.995]
59	Li2Mg1P2O7	XXII	46.11	42.45	190.8	0.296 ± 0.011	0.42	-	-	-
60	Li4Hf2Si3O12	I	21.27	0	442.5	0.193 ± 0.002	8.899	0.183 ± 0.016	14.09	[7.569, 26.229]
61	Li4Hf2Si3O12	IV	34.77	13.5	1204.8	0.333 ± 0.042	0.404	-	-	-
62	Li4Hf2Si3O12	V	38.33	17.06	289.7	0.293 ± 0.018	0.475	-	-	-
63	Li1Nb1Si2O7	VI	26.84	7.46	170.8	0.195 ± 0.061	3.071	0.732 ± 0.093	0	[0.0, 0.0]
64	Li1Nb1Si2O7	VIII	28.54	9.16	306.4	0.212 ± 0.04	6.984	0.328 ± 0.019	0.161	[0.078, 0.332]
65	Li1Nb1Si2O7	IX	29.64	10.26	811.7	0.246 ± 0.028	1.281	0.509 ± 0.085	0.001	[0.0, 0.026]
66	Li1Nb1Si2O7	XIII	34.83	15.45	595.9	0.207 ± 0.035	7.319	0.176 ± 0.063	21.633	[1.916, 244.31]
67	Li1Nb1Si2O7	XVII	36.27	16.89	424.7	0.236 ± 0.061	2.59	-	-	-
68	Li1Nb1Si2O7	XXIII	39.91	20.53	689	0.22 ± 0.091	6.322	-	-	-
69	Li1Nb1Si2O7	XXVII	41.03	21.65	503	0.215 ± 0.035	10.688	-	-	-
70	Li4Zr2Si3O12	I	34.07	0	150	0.166 ± 0.049	10.261	0.270 ± 0.006	0.756	[0.599, 0.955]
71	Li1Ta3P2O13	III	32.94	13.72	345.7	0.28 ± 0.071	0.311	-	-	-
72	Li1Ta3P2O13	IV	33.39	14.17	234.2	0.305 ± 0.029	0.538	0.406 ± 0.067	0.022	[0.002, 0.299]
73	Li1Ta3P2O13	VII	40.12	20.9	334.6	0.309 ± 0.032	0.483	-	-	-
74	Li1Ta3P2O13	VIII	41.33	22.11	705.3	0.175 ± 0.034	9.529	0.195 ± 0.052	5.734	[0.772, 42.602]
75	Li1Ta3P2O13	XI	47.97	28.75	279.6	0.236 ± 0.037	1.654	-	-	-
76	Li1Ta3P2O13	XII	49.85	30.63	129.1	0.26 ± 0.311	0.242	-	-	-
77	Li2Zr1Si1O5	I	26.86	0	201.7	0.351 ± 0.018	0.127	0.566 ± 0.052	0	[0.0, 0.003]
78	Li2Zr1Si1O5	III	40.59	13.73	502.9	0.276 ± 0.03	2.105	-	-	-
79	Li2Zr1Si1O5	VI	49.47	22.61	917.4	0.274 ± 0.028	1.43	0.249 ± 0.021	3.1	[1.371, 7.009]
80	Li1Al1P2O7	III	18.46	16.31	207.7	0.246 ± 0.056	1.864	-	-	-
81	Li1Al1P2O7	VI	27.12	24.97	316.6	0.296 ± 0.094	0.396	-	-	-
82	Li1Al1P2O7	VII	32.6	30.45	465.6	0.194 ± 0.016	6.063	-	-	-
83	Li1Al1P2O7	XIII	45.11	42.96	929	0.187 ± 0.018	9.089	-	-	-
84	Li1Al1P2O7	XIV	46.5	44.35	722.8	0.178 ± 0.035	10.914	-	-	-
85	Li3Sc1Si2O7	II	28.22	5.96	463.5	0.234 ± 0.068	2.957	0.236 ± 0.075	3.375	[0.188, 60.75]
86	Li3Ta2Al1O8	VIII	38.78	23.55	173.5	0.107 ± 0.127	12.234	-	-	-
87	Li3Ta2Al1O8	X	43.63	28.4	946.1	0.212 ± 0.041	9.197	0.242 ± 0.016	4.12	[2.185, 7.77]
88	Li1Ga1P2O7	II	20.87	10.59	194.8	0.277 ± 0.043	0.333	0.329 ± 0.044	0.049	[0.009, 0.264]
89	Li1Ga1P2O7	IV	26.43	16.15	309.1	0.3 ± 0.062	0.505	-	-	-
90	Li1Ga1P2O7	VII	34.41	24.13	141.4	0.346 ± 0.055	0.106	-	-	-
91	Li1Ga1P2O7	IX	41.47	31.19	1598	0.214 ± 0.078	3.041	-	-	-
92	Li1Ga1P2O7	XV	47.9	37.62	252.8	0.212 ± 0.046	2.566	-	-	-
